# Supplementary material for: Minor contributions of daytime monoterpenes are major contributors to atmospheric reactivity
Source: Copernicus journal article supplement (doi:10.5194/bg-2022-141), 2022-07-12
Supplement: Supplementary file [file bg-2022-141-AC1-supplement.pdf]

The authors would like to thank the reviewer for their comments and feedback on this manuscript. The reviewer comments have improved the quality and clarity of the research article. The authors have revised the manuscript in accordance with the reviewer comments. Line numbers referred to in the author response are the updated numbers after revision. The reviewer comments are in **blue** while the author's responses are in **black**:

## **Reviewer 1:**

### **General comments:**

This paper makes an excellent argument for the need of long-term speciated terpene data to correctly model atmospheric chemistry. Compounds with small ambient concentrations can still play a large role in oxidative capacity and potentially aerosol formation.

To me, this paper provides quantitative support for something that has been stated or implied in the literature for some time. I do not consider the light-dependence emission of limonene or the light-independent emission of  $\alpha$ -pinene to be novel, but the quantification of these patterns is nice to see. It gives the atmospheric community a lot to think about in terms of how to approach modeling these complicated systems.

We thank the reviewer for their acknowledgement of the contribution of this work to the field. We hope that our revisions adequately address their comments and concerns.

This paper raises two question in my mind:

Since there is a link between chemical structure and reactivity and some of the light-dependent emissions are highly reactive, then there must be a link between chemical structure and emission pathway (or at least internal synthesis). Can the authors explore this?

The reviewer raises a very interesting observation. We are interested in better understanding these possible connections and are conducting emissions experiments to explore this question. While outside the scope of the present manuscript, we are working to address this question in current measurements.

If compounds with small ambient concentrations matter, what about sesquiterpenes? I can see that they were measured in this study (at least 2 are mentioned), but they are not mentioned in the results. How do they factor into this conversation?

In our previous work, the two measured sesquiterpenes were found to not contribute significantly to calculated atmospheric reactivity. However, the measurement methods used in this work also may not capture all sesquiterpenes. Recent work out of our research group at the same measurement site that more comprehensively targeted sesquiterpenes reached a similar conclusion, that sesquiterpenes do not appear to contribute very much reactivity or aerosol formation potential, though in certain cases they may impact ozone reactivity to some extent (*Frazier et al.*, 2022, <https://doi.org/10.1039/D2EA00059H>). Given this, we do not include them

in this work. We have included a sentence in the manuscript to indicate the reason for their exclusion at line 143-144.

*While the measurement method captures two sesquiterpenes, they are not included in the analysis because these and related measurements have found they do not contribute significantly to most oxidant reactivity (Frazier et al., 2022, McGlynn et al., 2022).*

### Specific Comments:

The introduction needs some work. First, the references are sometimes distracting; some are repeated multiple times – for example, it is in each sentence within one paragraph. I think there is a more efficient way to use the literature.

We agree with the reviewer's concerns. Repetitive citations have been removed and the use of excessive citations has been trimmed.

I'm not sure that all references are necessary in each sentence; ensure that they all refer to what you think they do. I do not understand the "discrepancy" found in the literature. Are the authors trying to say there is disagreement about what terpenes are light- or temperature-dependent? I think this entire paragraph should be reframed. The emission of most monoterpenes are thought to be light-independent, but there is some evidence for light-dependent emission (similar to isoprene). This paper is going to use factor analysis to tease out how much of the emissions are in each category.

Thank you for your suggestions. This section of the introduction has been significantly edited (lines 42-54):

*However, some plants do produce and emit monoterpenes in a light-dependent manner (Staudt et al., 1999, Staudt and Seufert, 1995,; Harley et al., 2014, Yu et al., 2017, Taipale et al., 2011; Guenther et al., 2012). Despite these findings, light dependent monoterpene emissions have largely been deemed to contribute minimally to total monoterpene emissions. (Bouvier-Brown et al., 2009, Lerdau et al., 2003). Some studies suggest that this lack of contribution to total flux occurs because they are emitted from only a handful of plant taxa and the emission rates themselves have not been shown to be significant (Staudt et al., 2000, Loreto et al., 1998, Staudt et al., 1995). However, a few studies find that many trees emit low levels of monoterpenes in a light dependent manner, and that these emissions are seasonal and change with phenological patterns (Fischbach et al., 2002, Ghirardo et al., 2010, Taipale et al., 2011, Steinbrecher et al., 1999). Overall, understanding of the scale and seasonality of de novo monoterpene emissions is limited and highly variable in the literature. A major goal of the present work is to understand the potential role that the minor contribution of light dependent emissions and/or individual compounds with differing temporal variability may play in the atmosphere. Certain monoterpenes that are often emitted at low levels and/or in a light dependent manner have extremely high reactivities, raising the question of whether or not chemical impact may be disproportionate to flux magnitude.*

Although this is not the paper that describes the location and instrumentation, I think a little more detail is warranted. Specifically, I would like to see how sampling and calibration was accomplished because you are highlighting reactive species. Accounting for reactivity and deposition is so critical to the accuracy of these measurements.

The authors agree that additional details pertaining to sampling and calibration would benefit the manuscript. The following has been added to the methods section (lines 82-94):

*In brief, air is pulled from mid-canopy (~20 m above ground level) through an insulated and heated Teflon tube. Ozone is removed from the sample using a sodium thiosulfate infused quartz fiber filter (Pollmann et al., 2005) at the front of the inlet. Samples were collected mid-canopy in order to more closely represent the in-canopy environment for co-located studies seeking to understand ozone loss processes. A subsample of air is concentrated onto a multibed adsorbent trap, the details of which can be found in (McGlynn et al., 2021). A custom LabVIEW program (National Instruments) operates the instrument for hourly automated sample collection and analysis. Following sample collection, the trap is thermally desorbed to transfer the sample to the head of the GC column; details pertaining to GC run methods, column, and gas flow rates can be found in (McGlynn et al., 2021}.*

*The instrument is calibrated using a multi-component calibrant (Apel-Riemer Environmental Inc.) optionally mixed at one of four different flows to generate four different mixing ratios. A calibration sample occurs once every seven hours, rotating between zero air only, a calibrant at a fixed “tracking” mixing ratio, and a calibrant at one of three other mixing ratios. Details pertaining to calibrant composition, concentrations, peak integration, and data uncertainty can be found in (McGlynn et al., 2021}.*

In that same vein, Lines 115-116 is confusing – normalized values are multiplied by the sum of the concentrations – how does that provide speciated data?

We recognize that sentence was confusing. It referred simply to how the output of the PMF software needs to be scaled to put it into concentration units using the measured data. To avoid confusion we have removed the sentence and directed readers to the software documentation if interested (line 122):

*Further information on the PMF output can be found in Norris et al., (2014}.*

Limonene is used throughout as a model for light-dependent emissions, but according to Table 1, only 57% of its emissions are described that way. Can you comment on this?

The reviewer is of course correct that limonene has multiple sources, which is apparent in Figure 1, in which limonene exhibits differing diurnal profiles between seasons. Because limonene is the major contributor to LDF monoterpenes, and because it has high reactivity so exerts some outside influence, we use it throughout the manuscript as an example of the importance of daytime monoterpenes, but did not intend to imply it was a model LDF per se. We have tried to

make that clear in the revisions at a few points throughout the manuscript. Most explicitly, we have added the language below to the discussion of the PMF factors (line 203-206):

*It is important to note that most monoterpenes are split between the two factors and vary within the year, likely because of changing phenological patterns. While some compounds such as  $\alpha$ - and  $\beta$ -pinene are almost wholly found in the light independent factor, most of the compounds in the light dependent factor, such as limonene, still exhibit a strong light independent component.*

#### **Technical comments:**

There are some wording issues. For example, I think line 13 is better communicated as: “the need to monitor species with high atmospheric reactivity, even though they have low concentrations, to more accurately...”

Addressed

Line 18-19: “with secondary effects of other ecological factors” doesn’t make sense to me. I understand ecological effects play a role in BVOC emissions, but what is meant by “secondary effects”?

This has been changed to:

“with secondary effects from other factors such as meteorology and deposition”

A few issues with parentheses (missing or incorrectly placed) – e.g. Line 49, 50, 248

Addressed

The formatting is awkward when referring to papers that provided software or equations.

Addressed

Line 99: between May and September

Addressed

Line 179: the black arrows are not present in (b)

Addressed

Figure 3: the caption should have “and” instead of a comma. The black arrows should be noted in the caption.

Addressed

Table 1: the caption is insufficient; it implies that the percentages are calculated based only on light-dependent emissions. LIF and LDF acronyms must be defined here. Why are there only 11 species – where is the data for the other measured species? I think isoprene would be a great addition, since it is referenced and plotted throughout the paper. Also, the sesquiterpene data would be interesting (see comment above).

The caption now reads: *Percent of concentrations attributed to light independent (LIF) and light dependent (LDF) emissions between September 2019 - September 2020 and in summer 2020 (June, July, August).*

The PMF was performed with only monoterpenes to avoid weighting it toward finding an LDF factor; inclusion of isoprene yields similar results, but we felt it was less of an independent result as isoprene strongly pushes the algorithm toward the presence of such a factor. Because this table shows the quantitative split provided by the PMF, there is no way to include the compounds not included in the PMF like isoprene or sesquiterpenes

Line 201: “illuminate’s clear differences” – first, the apostrophe is incorrect. Secondly, I don’t see clear differences in Figure 5; the shape is actually quite similar.

The grammatical error has been corrected. The authors agree that the wording in this section can be clarified. The section now reads (line 215-218):

*Despite the low contribution of the light dependent factor to total monoterpene concentration, this factor has a large impact on ozone and OH reactivity. Comparing the stacked diurnal concentration profile (Figure 5a) to the stacked ozone and OH reactivity diurnal profile (Figure 5b, c) in summer, limonene and  $\alpha$ -pinene prevail as the major contributors to both ozone and OH reactivity.*

Figure 5: explain the dotted lines in the caption. Citing “figure 5a” twice in the same line (214) is not necessary.

Addressed

Word choice should be considered with care. Words like “belies” and “concomitantly” are not commonly used.

We agree, and have changed “belies.” However, we feel that the specific meaning of concomitantly very aptly conveys our meaning in this case and have elected to retain it.

Line 233: is the 20% for both ozone and OH reactivity?

Yes

Lines 253-255: This sentence is very awkward and should be rephrased.

The authors appreciate the reviewer for pointing out this run-on sentence. The authors have changed this sentence to (line 264-268):

*Capturing the detail of this or any monoterpene in emissions models is difficult, as the light dependent fraction depends on plant species and other ecological variables. However, it is clear there is some disconnect between the results here and dominant models that, for example, estimate  $\alpha$ -pinene as more strongly light dependent than limonene (Guenther et al., 2012) and do not tend to vary light dependent fraction by plant function type.*
